# Supplementary material for: LncRNA modulates Hippo-YAP signaling to reprogram iron metabolism
Source: PubMed Central journal article supplement (PMC10119135; doi:10.1038/s41467-023-37871-5), 2023-04-20
Supplement: 41467_2023_37871_MOESM1_ESM.pdf [file 41467_2023_37871_MOESM1_ESM.pdf]

# **LncRNA Modulates Hippo-YAP Signaling to Reprogram Iron Metabolism**

Xin-yu He<sup>#1,2,3</sup>, Xiao Fan<sup>#1,2,3</sup>, Lei Qu<sup>1,2,3</sup>, Xiang Wang<sup>4</sup>, Li Jiang<sup>5</sup>, Ling-jie Sang<sup>1</sup>, Cheng-yu Shi<sup>1</sup>, Siyi Lin<sup>1</sup>, Jie-cheng Yang<sup>1</sup>, Zuo-zhen Yang<sup>1</sup>, Kai Lei<sup>1</sup>, Jun-hong Li<sup>1</sup>, Huai-qiang Ju<sup>6</sup>, Qingfeng Yan<sup>1</sup>, Jian Liu<sup>7,8</sup>, Fudi Wang<sup>5</sup>, Jianzhong Shao<sup>1</sup>, Yan Xiong<sup>9</sup>, Wenqi Wang<sup>\*10</sup>, and Aifu Lin<sup>\*,1,2,3,11,12</sup>

#These authors have contributed equally.

\*To whom correspondence should be addressed: [linaifu@zju.edu.cn](mailto:linaifu@zju.edu.cn),  
[wenqi6@uci.edu](mailto:wenqi6@uci.edu),

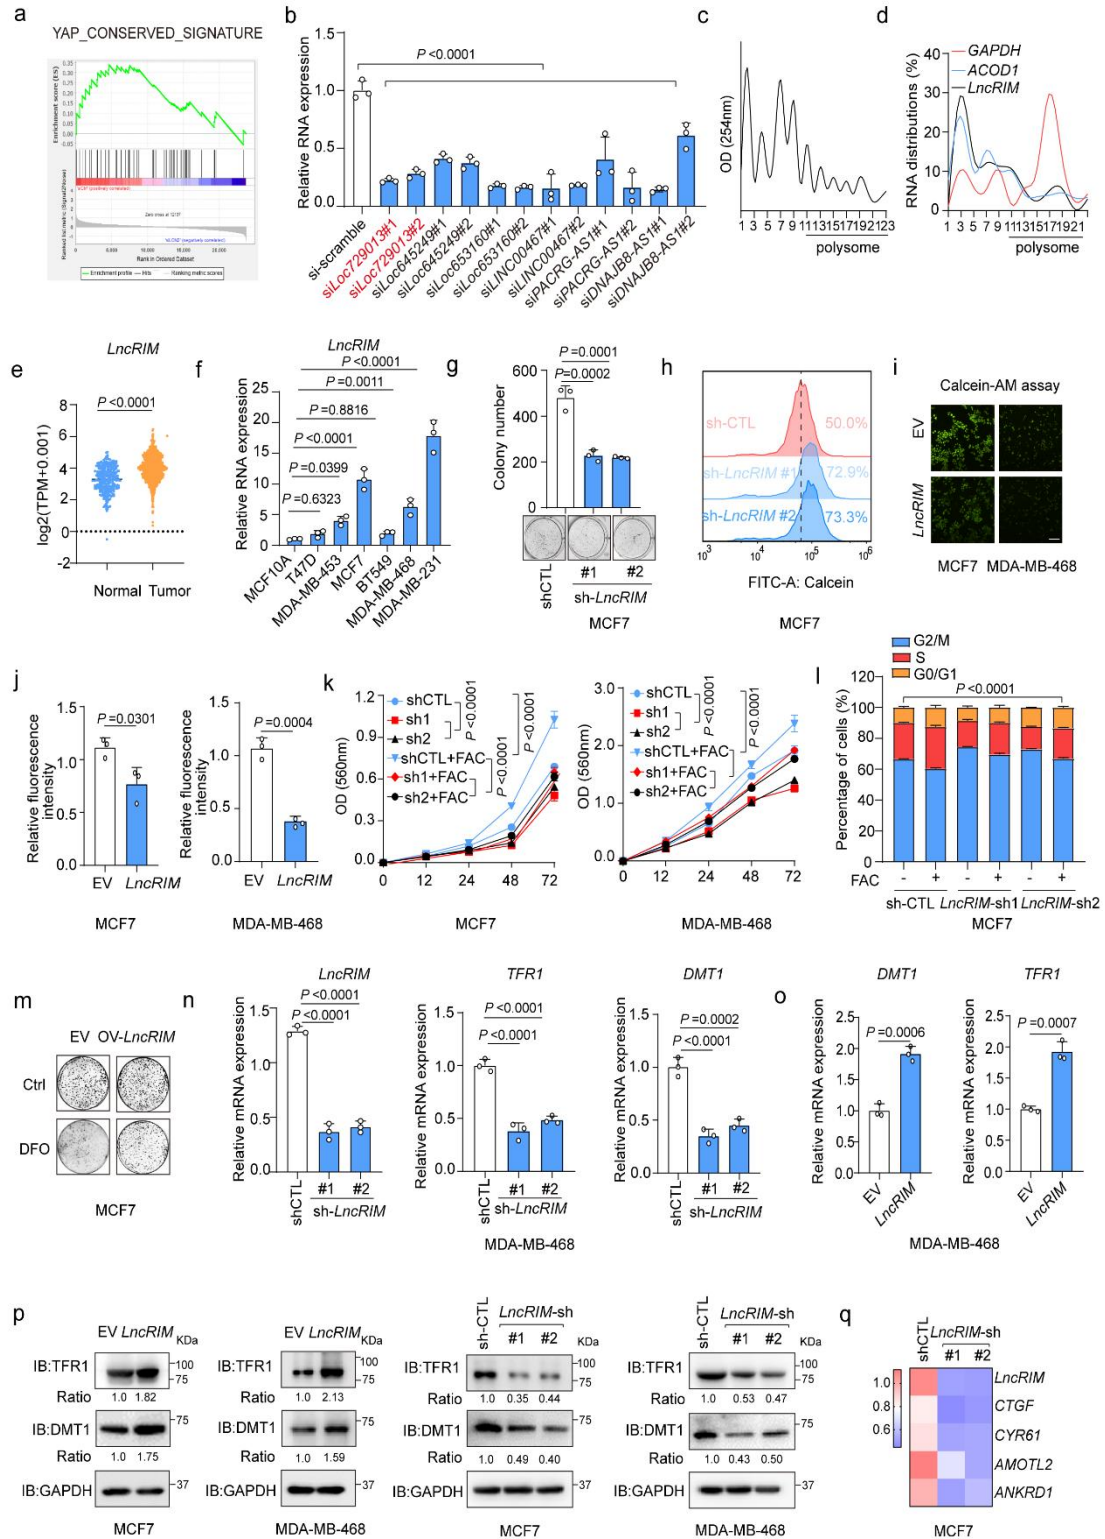

**Supplementary Figure. 1 *LncRIM* regulates iron metabolism and breast cancer progression.**

(a) Gene set enrichment analysis using the C6 canonical pathways Broad

MsigDB database on gene expression data compared control and the LCN2 knockdown MDA-MB-231 cell lines.(b)The knockdown efficiency of siRNA interference of the indicated candidates lncRNAs was examined by RT-qPCR. (mean  $\pm$  SD, n = 3, One-way ANOVA analysis).(c and d) Polysome profiling of MCF-7 cells (c) and the amount of indicated transcript in each fraction was determined by RT-qPCR, and represented as percentage of all fractions (d). GAPDH was used as the canonical mRNA, and lncRNA *ACOD1* was used as the untranslated lncRNA.(e) Analysis of the *LncRIM* expression in normal (n=292)and tumor samples (n=1102)from TCGA database. (mean  $\pm$  SD, two-sided Student's *t*-test) (f) RT-qPCR detection of *LncRIM* expression in different breast cancer cell lines. (mean  $\pm$  SD, n = 3, One-way ANOVA analysis).(g) Colony formation assay of control and *LncRIM* knockdown MCF-7 cell lines.(mean  $\pm$  SD, n = 3, One-way ANOVA analysis).(h) Calcein-AM and flow cytometry were performed to assess the cellular iron level of control and *LncRIM* knockdown MCF-7 cells.(i and j) The cellular iron level in EV and *LncRIM* overexpressed MCF-7 and MDA-MB-468 cells were assayed by Calcein-AM assay(i). The values was normalized to the control group (j). Scale bar 100  $\mu$ m. (mean  $\pm$  SD, n=3, two-sided Student's *t*-test).(k) Cell proliferation viability was assessed of EV and *LncRIM* overexpressed MCF-7 and MDA-MB-468 cells with or without FAC (200 $\mu$ M) stimulation. (mean  $\pm$  SD, n = 3, Two-way ANOVA analysis).(l) Cell cycle analysis of control and *LncRIM* knockdown MCF-7 cells with or without FAC stimulation (200 $\mu$ M)

for 24hr. (mean  $\pm$  SD, n = 3 ,Two-way ANOVA analysis).(m) Colony formation assay of EV and *LncRIM* overexpressed MCF-7 cells treated with or without DFO (100  $\mu$ M) stimulation.(n and o) The DMT1 and TFR1 expression in control and *LncRIM* knockdown or *LncRIM* overexpressed MDA-MB-468 cells was examined by RT-qPCR. (mean  $\pm$  SD, n = 3, One-way ANOVA analysis/two-sided Student's *t*-test).(p) Immunoblot detection of DMT1 and TFR1 in control and *LncRIM* knockdown or overexpressed MCF-7 and MDA-MB-468 cells.(q) RT-qPCR was performed to detect YAP targets expression of *LncRIM* knockdown MCF-7 cells.

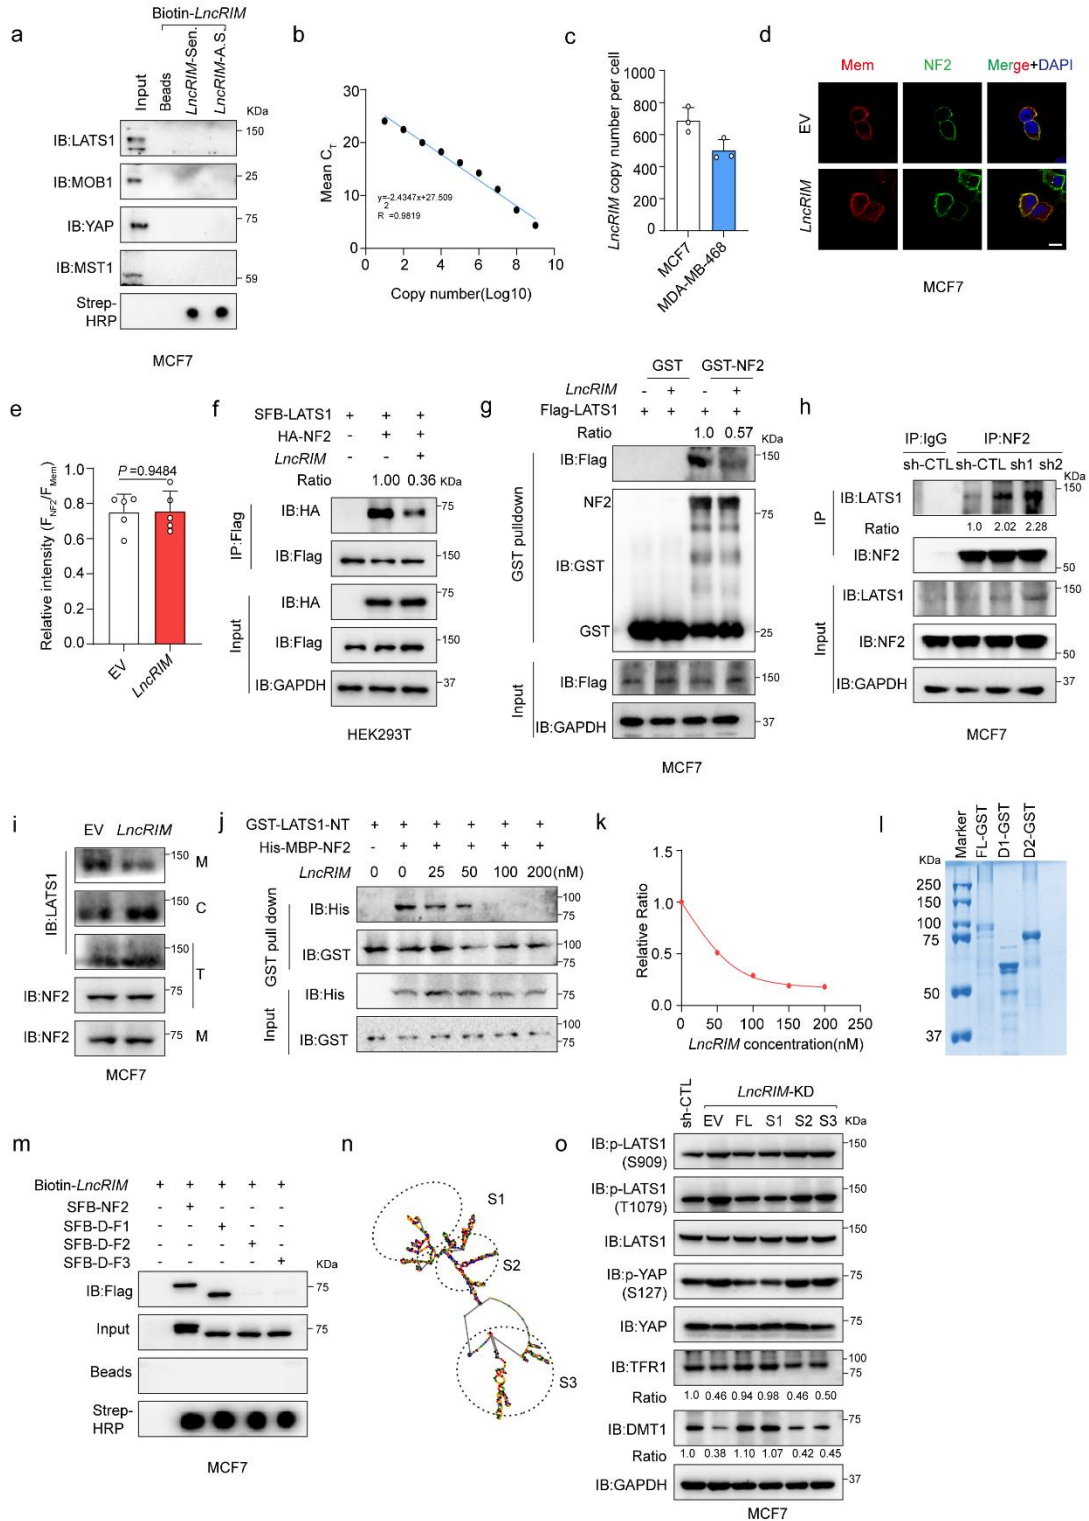

**Supplementary Figure. 2 *LncRIM* interacts with NF2 to inactive LATS1 kinase.**

(a) *In vitro*-transcribed biotinylated *LncRIM* sense (Sen.) or antisense (A.S.)

transcripts were incubated with MCF-7 cell lysates for the RNA pull-down assay, followed by immunoblot with indicated antibodies. **(b and c)** *LncRIM* copy number was determined in MCF-7 and MDA-MB-468 cell lines,  $n = 3$ . **(d and e)** Immunofluorescent staining of NF2 (Green) in control and *LncRIM* overexpressed MCF-7 cells. Cell membrane marker was stained with Red and the NF2 was detected with Alexa Fluor 488. Scale bar, 10  $\mu\text{m}$ . The membrane location of NF2 ( $F_{\text{NF2}}/F_{\text{Mem}}$ ) was analyzed with Image-J. (mean  $\pm$  SD,  $n=5$ , two-sided Student's *t*-test). **(f)** Co-IP was performed to test the interaction between LAST1 and NF2 of HEK-293T cells expressing SFB-LATS1, HA-NF2 and *LncRIM*. **(g)** 20nmol GST-NF2 recombinant proteins were incubated with MCF-7 lysates expressing Flag-LATS1 and *LncRIM*. GST was used as the negative control. **(h)** An endogenous Co-IP was performed to assess NF2 and LATS1 interaction in control and *LncRIM* knockdown MCF-7 cells by NF2 antibodies. IgG was used as the negative control. **(i)** Subcellular fractionation assay was performed to assess LATS1 membrane association of control and *LncRIM* overexpressed MCF-7 cells. (M: membrane, C: cytoplasm, T: total). **(j and k)** 20nmol GST-LATS1-NT recombinant proteins and 20nmol His-MBP-NF2 recombinant proteins were incubated *in vitro* with different concentration of *in-vitro* transcribed biotinylated sense-*LncRIM*. GST-LATS1-NT was immunoprecipitated by GST beads. **(l)** Coomassie staining gel of the purified GST-NF2 and GST-NF2 mutants. The concentration was determined by the indicated BSA. **(m)** *In vitro*-transcribed biotinylated

*LncRIM* sense (Sen.) transcripts were incubated with MCF-7 cell lysates expressing different NF2 mutants. (n) The secondary structure of *LncRIM* was predicted by RNAFolder software and schematic illustration of *LncRIM* mutations. (o) Immunoblot detection of the DMT1, TFR1, LATS1, and YAP expression in control and *LncRIM* knockdown MCF-7 cells transfecting with full-length *LncRIM* or different truncations of *LncRIM*.

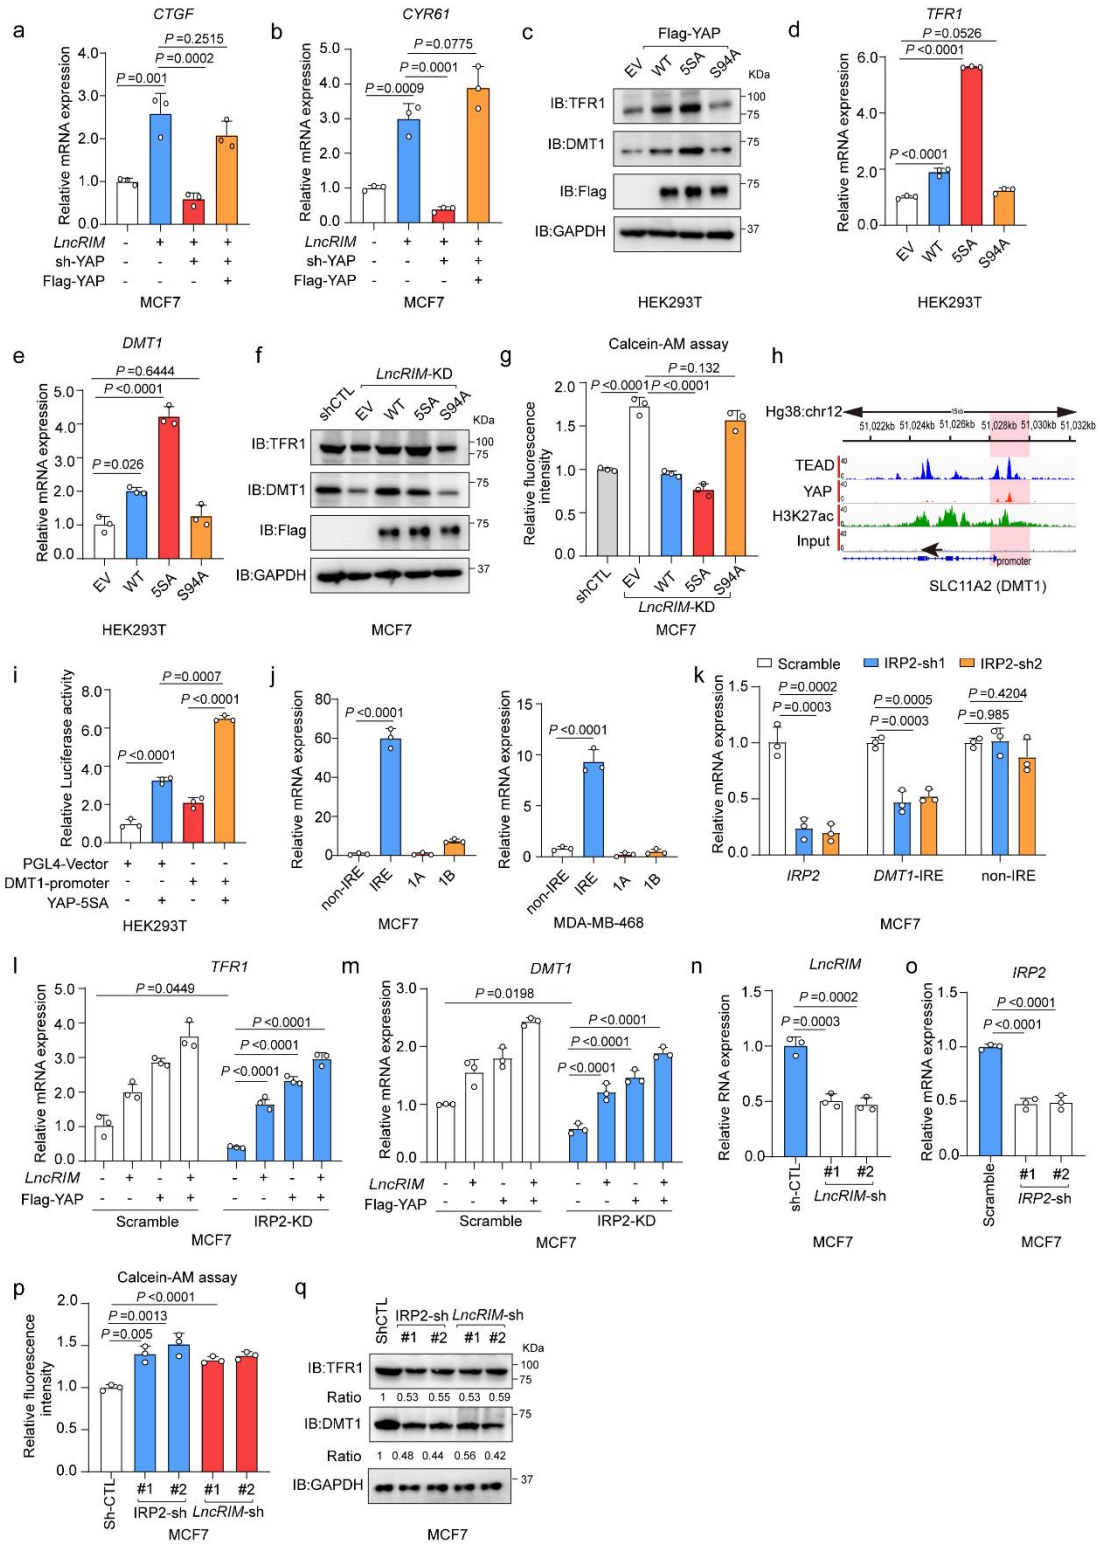

**Supplementary Figure. 3 *LncRIM* modulates iron metabolism in a Hippo-YAP pathway-dependent manner.**

(a and b) The expression of *CTGF* and *CYR61* of YAP knockdown MCF-7 cells



with or without re-expression of *LncRIM* was measured by RT-qPCR. (mean  $\pm$  SD, n = 3, One-way ANOVA analysis).(c-e) Immunoblot (c) and RT-qPCR were performed to examine the expression of DMT1(d) and TFR1 (e) in MCF-7 cells stably expressing indicated YAP mutants. (mean  $\pm$  SD, n = 3, One-way ANOVA analysis).(f and g) The DMT1 and TFR1 expression (f) , and the cellular iron level (g) of control and *LncRIM* knockdown MCF-7 cells transfecting with indicated YAP mutants was detected by immunoblot and Calcein-AM assay. (mean  $\pm$  SD, n = 3, One-way ANOVA analysis).(h) ChIP-seq analysis of the YAP/TEAD binding elements in *DMT1* promoter region by using the data of GEO dataset (GSE107013).(i) Luciferase reporter assay was performed in MCF-7 cells with overexpression of YAP-5SA and DMT1-promoter. (mean  $\pm$  SD, n = 3, One-way ANOVA analysis).(j) RT-qPCR detection of the four DMT1 isoforms expression in MCF-7 cells and MDA-MB-468 cells by using specific targets. (mean  $\pm$  SD, n = 3, two-sided Student's *t*-test).(k) The expression of IRE-DMT1 and non-IRE DMT1 in control and IRP2 knockdown MCF-7 cells. (mean  $\pm$  SD, n = 3, One-way ANOVA analysis).(l and m) The expression of DMT1 and TFR1 in control and IRP2 knockdown MCF-7 cells expressing Flag-YAP or *LncRIM* were measured by RT-qPCR. (mean  $\pm$  SD, n = 3, Two-way ANOVA analysis).(n and o) RT-qPCR detection of knockdown efficiency of *LncRIM* (n) and IRP2 (o) in MCF-7 cells (mean  $\pm$  SD, n = 3, One-way ANOVA analysis).(p and q) The cellular iron level (p), and the TFR1,DMT1 expression(q) in control and *LncRIM* knockdown or IRP2

knockdown MCF-7 cells were measured by calcein-AM assay and immunoblot.

(mean  $\pm$  SD, n = 3, One-way ANOVA analysis).

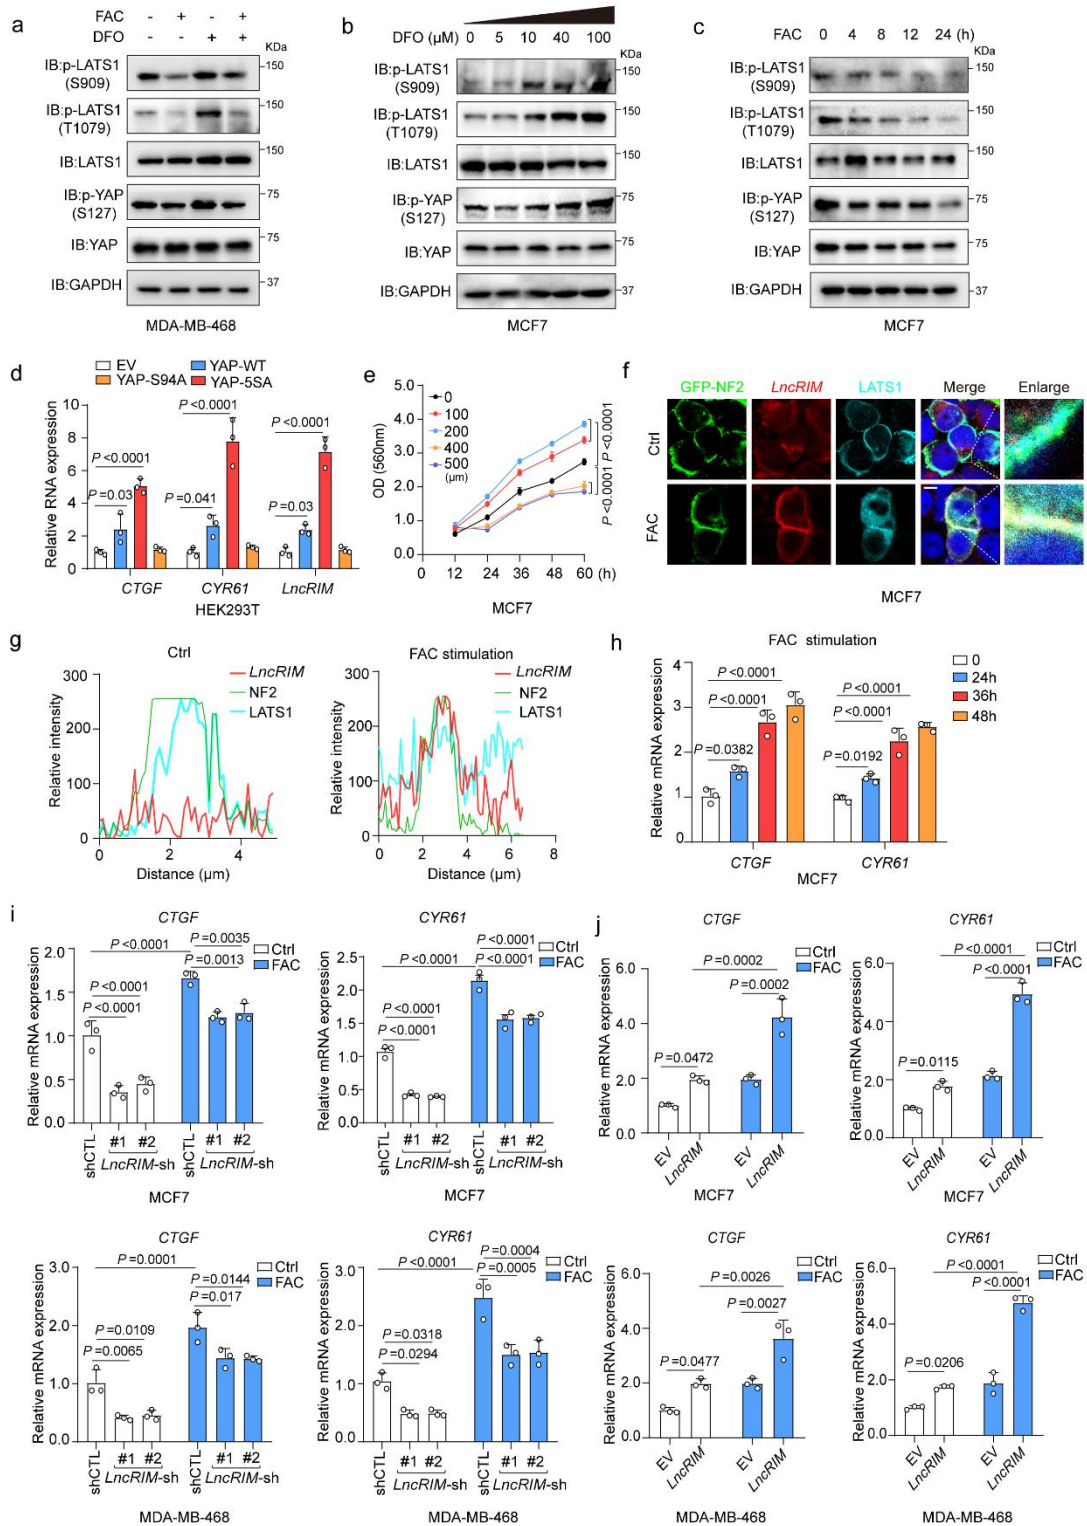

**Supplementary Figure. 4 The iron-triggered *LncRIM*-NF2 feedback loop hyperactivates YAP .**

(a) Immunoblot detection of p-YAP (S127), p-LATS1(S909, T1079) expression.

Serum-starved MDA-MB-468 cells are treated with FAC (200  $\mu$ M) or DFO (100  $\mu$ M) for 24 hr. **(b and c)** Immunoblot detection of p-YAP (S127), p-LATS1(S909, T1079) expression in serum-starved MCF-7 cells treated with different concentration of DFO for 24 hr **(b)**, or treated with FAC (200  $\mu$ M) for indicated time **(c)**. **(d)** Activated YAP induces the transcription of *LncRIM* and YAP downstream targets. The expression of *LncRIM* and YAP downstream targets was examined by RT-qPCR in HEK-293T cells expressing indicated YAP mutants. (mean  $\pm$  SD, n = 3, One-way ANOVA analysis). **(e)** Cell proliferation viability of MCF-7 cells treated with different concentration FAC was assessed by MTT assay. (mean  $\pm$  SD, n = 3, Two-way ANOVA analysis). **(f and g)** Immunofluorescence staining was performed to assess the interaction between LATS1 and NF2 in MCF-7 cells expressing GFP-NF2(Green) with or without FAC stimulation (200 $\mu$ M) for 24hr. Line scan of the relative fluorescence intensity of the signal **(f)** is plotted to show the peak overlapping **(g)**. The *LncRIM* probe was labeled with Cy3 (Red) and the LATS1 was detected with Alexa Fluor 647(Cyan). Scale bar, 20  $\mu$ m. **(h)** The YAP downstream targets expression in MCF-7 cells treated with FAC (200 $\mu$ M) for different time were examined by RT-qPCR. (mean  $\pm$  SD, n = 3, One-way ANOVA analysis). **(i and j)** RT-qPCR detection of the expression of *CTGF* and *CYR61* in control and *LncRIM* knockdown **(i)** or *LncRIM* overexpressed **(j)** MCF-7 and MDA-MB-468 cells with FAC stimulation (200 $\mu$ M) for 48hr (mean  $\pm$  SD, n = 3, Two-way ANOVA analysis).

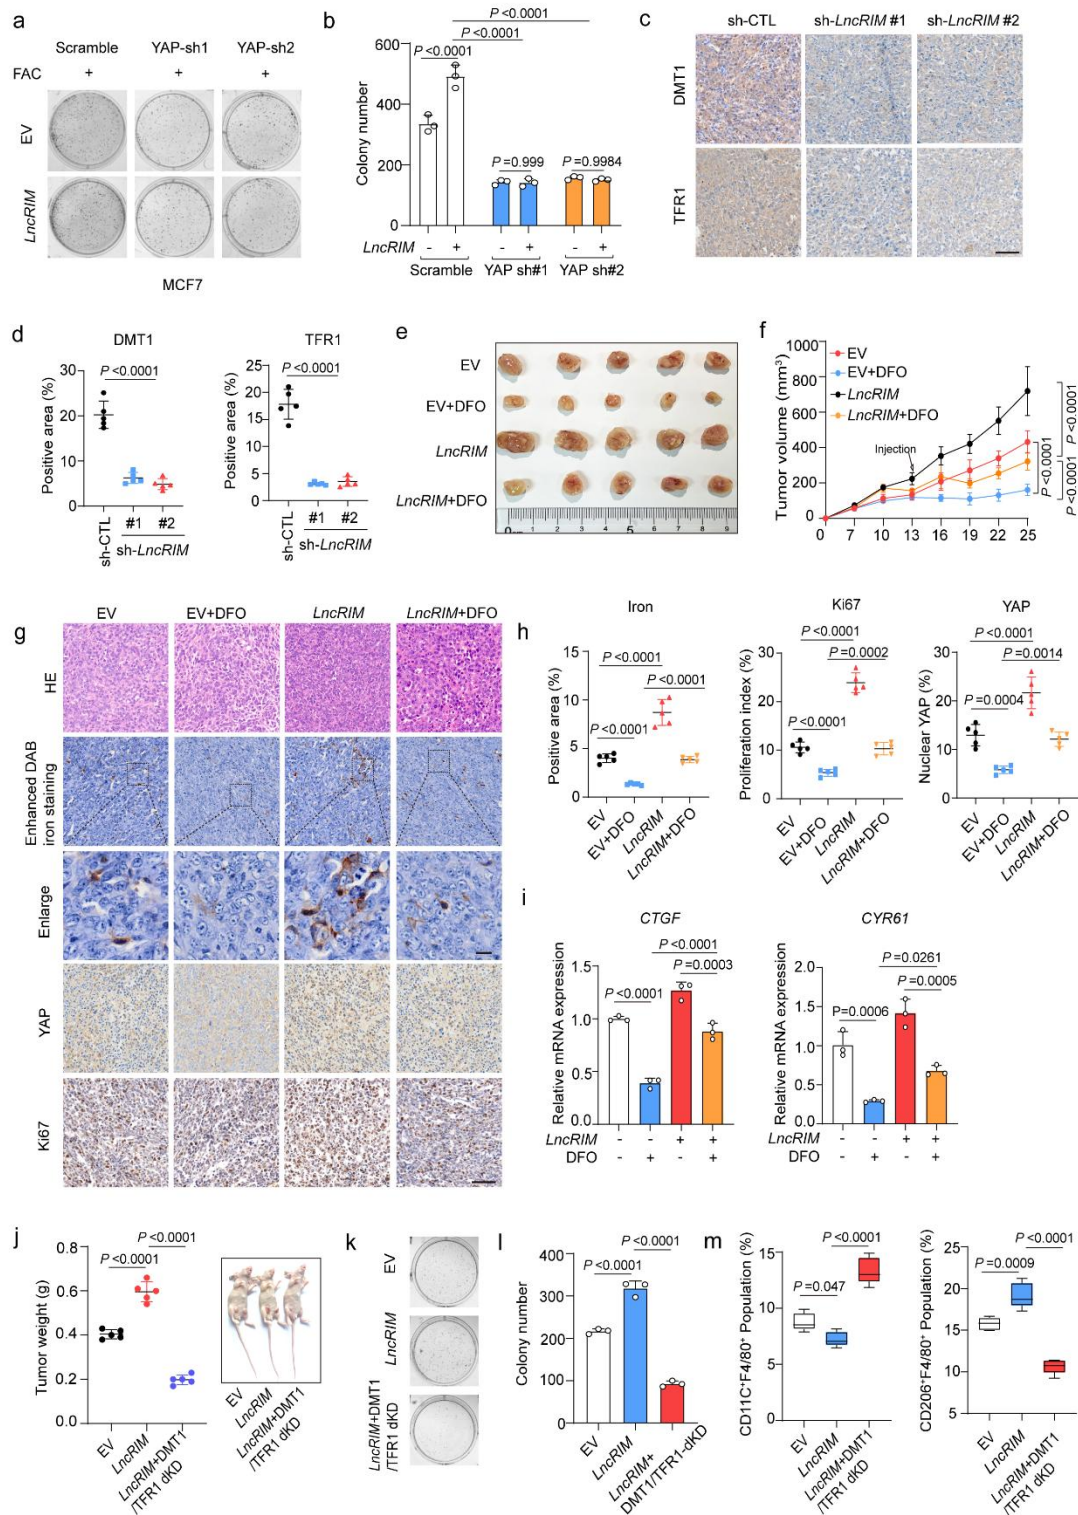

**Supplementary Figure. 5 *LncRIM*-YAP axis-mediated iron metabolism promotes tumor progression.**

(a and b) Colony formation assay of control and YAP knockdown MCF-7 cells

stimulated with FAC (200  $\mu$ M). (mean  $\pm$  SD, n = 3, Two-way ANOVA analysis).(c and d) IHC staining of DMT1 and TFR1 of randomly selected tumors from mice subcutaneously injected with the control or *LncRIM* knockdown MDA-MB-468 cells (c). Scale bar, 100  $\mu$ m. The relative intensities of IHC were quantified by ImageJ(d). The data are presented as the mean  $\pm$  SD of n = 5 mice per group, One-way ANOVA analysis.(e and f) Nude mice were injected with EV or *LncRIM* overexpressed MDA-MB-468 cells. After 13 days, two groups of nude mice were intraperitoneally injected with DFO (16 mg/kg) dissolved in 0.9% NaCl, once a day for 10 days. Tumor volumes were assessed (f). The data are presented as the mean  $\pm$  SD of n = 5 mice per group, Two-way ANOVA analysis.(g and h) Representative IHC and iron staining of randomly selected tumors from mice subcutaneously injected with indicated MDA-MB-468 cell lines (g). Scale bar, 100  $\mu$ m. The relative intensities were quantified by ImageJ (h). The data are presented as the mean  $\pm$  SD of n = 5 mice per group, One-way ANOVA analysis.(i) RT-qPCR detection of YAP downstream genes of the indicated subcutaneous xenograft tumors. (mean  $\pm$  SD, n = 3, One-way ANOVA analysis).(j) Tumor weight was detected of nude mice injected with control, *LncRIM* overexpressed, or double knockdown of DMT1/TFR1 with overexpression of *LncRIM* MDA-MB-468 cell lines. (mean  $\pm$  SD, n = 5, One-way ANOVA analysis).(k and l) Colony formation assay of control, *LncRIM* overexpressed and double knockdown of DMT1/TFR1 with overexpression of *LncRIM* MCF-7 cell lines.(mean  $\pm$  SD, n =

3, One-way ANOVA analysis).**(m)** Flow cytometry analysis of M1 and M2-like tumor-associated macrophages from orthotopic injection tumor.(mean  $\pm$  SD, n = 5, One-way ANOVA analysis). Data are presented as a box plot with box and whiskers. Bounds of box show the 25th and 75th percentiles, and the central lines in the box represent the median value. Whiskers show min to max value. Gating strategy is in the supplementary figure 6.

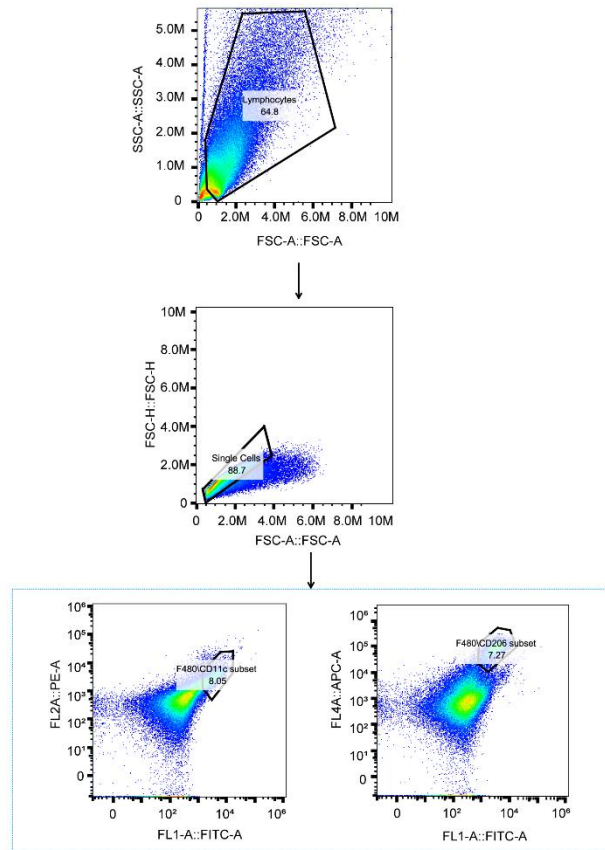

**Supplementary Figure. 6 Gating strategy for detection of macrophages polarization.**

Live cells in leukocyte fraction were gated via FSC and SSC, after exclusion of dead cells. Macrophages population was gated based on the surface expression of F4/80. In the blue dashed box : M1 macrophages population was gated based on the surface expression of CD11c. M2 macrophages population was gated based on the expression of CD206.



**Table S1. Clinipathological Parameters of Tissue Microarrays Used in this Study. Related to Figure 1d**

| Breast cancer tissue array, including TNM and pathology grade, 69 cases/69 cores |       |     |        |                           |       |       |        |           |
|----------------------------------------------------------------------------------|-------|-----|--------|---------------------------|-------|-------|--------|-----------|
| Positon                                                                          | Age   | Sex | Organ  | Pathological Diagnosis    | Grade | Stage | TNM    | Type      |
| A1                                                                               | 60-70 | F   | Breast | Invasive ductal carcinoma | 2     | Ia    | T1N0M0 | Malignant |
| A2                                                                               | 40-50 | F   | Breast | Invasive ductal carcinoma | 1     | Ia    | T1N0M0 | Malignant |
| A3                                                                               | 50-60 | F   | Breast | Invasive ductal carcinoma | 1     | Ia    | T1N0M0 | Malignant |
| A5                                                                               | 60-70 | F   | Breast | Invasive ductal carcinoma | 1     | Ia    | T1N0M0 | Malignant |
| A6                                                                               | 30-40 | F   | Breast | Invasive ductal carcinoma | 3     | Ia    | T1N0M0 | Malignant |
| A5                                                                               | 70-80 | F   | Breast | Invasive ductal carcinoma | 2     | Ila   | T2N0M0 | Malignant |
| A6                                                                               | 70-80 | F   | Breast | Invasive ductal carcinoma | 3     | Ia    | T1N0M0 | Malignant |
| A8                                                                               | 30-40 | F   | Breast | Invasive ductal carcinoma | 3     | Ia    | T1N0M0 | Malignant |
| A9                                                                               | 40-50 | F   | Breast | Invasive ductal carcinoma | 1     | Ila   | T2N0M0 | Malignant |
| B1                                                                               | 50-60 | F   | Breast | Invasive ductal carcinoma | 3     | Ia    | T1N0M0 | Malignant |
| B2                                                                               | 60-70 | F   | Breast | Invasive ductal carcinoma | 3     | Ia    | T1N0M0 | Malignant |
| B3                                                                               | 20-30 | F   | Breast | Invasive ductal carcinoma | 3     | Ia    | T1N0M0 | Malignant |
| B4                                                                               | 40-50 | F   | Breast | Invasive ductal carcinoma | 3     | Ila   | T2N0M0 | Malignant |
| B5                                                                               | 80-90 | F   | Breast | Invasive ductal carcinoma | 2     | Ila   | T2N0M0 | Malignant |
| B6                                                                               | 50-60 | F   | Breast | Invasive ductal carcinoma | 2     | Ia    | T1N0M0 | Malignant |
| B7                                                                               | 70-80 | F   | Breast | Invasive ductal carcinoma | 2     | Ia    | T1N0M0 | Malignant |
| B8                                                                               | 60-70 | F   | Breast | Invasive ductal carcinoma | 1     | Ia    | T1N0M0 | Malignant |
| B9                                                                               | 60-70 | F   | Breast | Invasive ductal carcinoma | 2     | Ia    | T1N0M0 | Malignant |
| B10                                                                              | 70-80 | F   | Breast | Invasive ductal carcinoma | 2     | Ilb   | T2N1M0 | Malignant |
| C1                                                                               | 50-60 | F   | Breast | Invasive ductal carcinoma | 3     | Ila   | T2N0M0 | Malignant |
| C2                                                                               | 80-90 | F   | Breast | Invasive ductal carcinoma | 3     | Ila   | T2N0M0 | Malignant |
| C3                                                                               | 50-60 | F   | Breast | Invasive ductal carcinoma | 3     | Ilb   | T2N1M0 | Malignant |
| C4                                                                               | 70-80 | F   | Breast | Invasive ductal carcinoma | 3     | Ilb   | T2N1M0 | Malignant |
| C5                                                                               | 50-60 | F   | Breast | Invasive ductal carcinoma | 3     | Ila   | T1N1M0 | Malignant |
| C6                                                                               | 40-50 | F   | Breast | Invasive ductal carcinoma | 3     | Ilb   | T2N1M0 | Malignant |
| C7                                                                               | 70-80 | F   | Breast | Invasive ductal carcinoma | 3     | Ilb   | T2N1M0 | Malignant |
| C8                                                                               | 80-90 | F   | Breast | Invasive ductal carcinoma | 2     | Ila   | T2N0M0 | Malignant |
| C9                                                                               | 50-60 | F   | Breast | Invasive ductal carcinoma | 3     | Ila   | T2N0M0 | Malignant |
| C10                                                                              | 70-80 | F   | Breast | Invasive ductal carcinoma | 3     | Ila   | T1N1M0 | Malignant |
| D1                                                                               | 50-60 | F   | Breast | Invasive ductal carcinoma | 3     | Ilb   | T2N1M0 | Malignant |
| D2                                                                               | 40-50 | F   | Breast | Invasive ductal carcinoma | 3     | Ilb   | T2N1M0 | Malignant |
| D3                                                                               | 60-70 | F   | Breast | Invasive ductal carcinoma | 3     | Ilb   | T2N1M0 | Malignant |
| D4                                                                               | 50-60 | F   | Breast | Invasive ductal carcinoma | 3     | Ilb   | T3N0M0 | Malignant |
| D5                                                                               | 30-40 | F   | Breast | Invasive ductal carcinoma | 1     | Ila   | T2N0M0 | Malignant |
| D6                                                                               | 40-50 | F   | Breast | Invasive ductal carcinoma | 3     | Ilb   | T2N1M0 | Malignant |
| D7                                                                               | 70-80 | F   | Breast | Invasive ductal carcinoma | 3     | Ila   | T1N1M0 | Malignant |
| D8                                                                               | 60-70 | F   | Breast | Invasive ductal carcinoma | 3     | Ilb   | T2N1M0 | Malignant |
| D9                                                                               | 50-60 | F   | Breast | Invasive ductal carcinoma | 1     | Ila   | T2N0M0 | Malignant |
| D10                                                                              | 70-80 | F   | Breast | Invasive ductal carcinoma | 2     | Ila   | T2N0M0 | Malignant |
| E1                                                                               | 40-50 | F   | Breast | Invasive ductal carcinoma | 3     | Ilb   | T2N1M0 | Malignant |
| E2                                                                               | 60-70 | F   | Breast | Invasive ductal carcinoma | 3     | Ilb   | T2N1M0 | Malignant |
| E3                                                                               | 60-70 | F   | Breast | Invasive ductal carcinoma | 3     | Ilb   | T2N1M0 | Malignant |
| E4                                                                               | 60-70 | F   | Breast | Invasive ductal carcinoma | 3     | Ilb   | T2N1M0 | Malignant |
| E5                                                                               | 40-50 | F   | Breast | Invasive ductal carcinoma | 2     | Illa  | T3N1M0 | Malignant |
| E6                                                                               | 40-50 | F   | Breast | Invasive ductal carcinoma | 3     | Illc  | T3N3M0 | Malignant |
| E7                                                                               | 30-40 | F   | Breast | Invasive ductal carcinoma | 2     | Illc  | T3N3M0 | Malignant |
| E8                                                                               | 30-40 | F   | Breast | Invasive ductal carcinoma | 3     | Ilb   | T3N0M0 | Malignant |
| E9                                                                               | 50-60 | F   | Breast | Invasive ductal carcinoma | 3     | Illc  | T3N3M0 | Malignant |
| E10                                                                              | 50-60 | F   | Breast | Invasive ductal carcinoma | 3     | Illa  | T2N2M0 | Malignant |
| F1                                                                               | 30-40 | F   | Breast | Invasive ductal carcinoma | 3     | Illc  | T2N3M0 | Malignant |
| F2                                                                               | 50-60 | F   | Breast | Invasive ductal carcinoma | 3     | Illa  | T1N2M0 | Malignant |
| F3                                                                               | 50-60 | F   | Breast | Invasive ductal carcinoma | 3     | Illb  | T4N4M0 | Malignant |
| F6                                                                               | 60-70 | F   | Breast | Invasive ductal carcinoma | 3     | Illc  | T2N3M0 | Malignant |
| F7                                                                               | 70-80 | F   | Breast | Invasive ductal carcinoma | 3     | Illa  | T3N1M0 | Malignant |
| F8                                                                               | 40-50 | F   | Breast | Invasive ductal carcinoma | 3     | Illb  | T4N1M0 | Malignant |
| F9                                                                               | 30-40 | F   | Breast | Invasive ductal carcinoma | 3     | Illa  | T3N1M0 | Malignant |
| F10                                                                              | 60-70 | F   | Breast | Invasive ductal carcinoma | 3     | Illc  | T2N3M0 | Malignant |
| G1                                                                               | 70-80 | F   | Breast | Invasive ductal carcinoma | 1     | Ia    | T1N0M0 | Malignant |
| G2                                                                               | 50-60 | F   | Breast | Invasive ductal carcinoma | 1     | Ia    | T1N0M0 | Malignant |
| G4                                                                               | 60-70 | F   | Breast | Invasive ductal carcinoma | 1     | Ila   | T2N0M0 | Malignant |
| G5                                                                               | 70-80 | F   | Breast | Invasive ductal carcinoma | 1     | Ia    | T1N0M0 | Malignant |
| G6                                                                               | 50-60 | F   | Breast | Invasive ductal carcinoma | 1     | Ia    | T1N0M0 | Malignant |
| G7                                                                               | 50-60 | F   | Breast | Invasive ductal carcinoma | 1     | Ia    | T1N0M0 | Malignant |
| H2                                                                               | 60-70 | F   | Breast | Invasive ductal carcinoma | 2     | Ila   | T1N1M0 | Malignant |
| H3                                                                               | 60-70 | F   | Breast | Invasive ductal carcinoma | 1     | Ila   | T2N0M0 | Malignant |
| H4                                                                               | 50-60 | F   | Breast | Invasive ductal carcinoma | 3     | Ila   | T2N0M0 | Malignant |
| H5                                                                               | 70-80 | F   | Breast | Invasive ductal carcinoma | 3     | Ila   | T2N0M0 | Malignant |
| H6                                                                               | 80-90 | F   | Breast | Invasive ductal carcinoma | 3     | Ila   | T2N0M0 | Malignant |
| H7                                                                               | 50-60 | F   | Breast | Invasive ductal carcinoma | 3     | Ila   | T2N0M0 | Malignant |

**Table S2. The correlation between clinicopathological parameters and *LncRIM* expression in Breast cancer. Related to Figure 1,6**

|                              | <u><i>LncRIM</i> expression</u> |            | <i>P</i> * |
|------------------------------|---------------------------------|------------|------------|
|                              | Low, n(%)                       | High, n(%) |            |
| <b>Age</b>                   |                                 |            |            |
| < 45                         | 15(45.5)                        | 18(54.5)   | 0.5214     |
| ≥45                          | 34(52.3)                        | 31(47.7)   |            |
| <b>Invasive depth</b>        |                                 |            |            |
| T1-T2                        | 43(51.8)                        | 40(48.2)   | 0.4        |
| T3-T4                        | 6(40.0)                         | 9(60.0)    |            |
| <b>Lymph node metastasis</b> |                                 |            |            |
| N=0                          | 20(57.1)                        | 15(42.9)   | 0.2918     |
| N=1,2,3                      | 29(46.0)                        | 34(54.0)   |            |
| <b>TNM Stage</b>             |                                 |            |            |
| I-II                         | 37(51.4)                        | 35(48.6)   | 0.6472     |
| III-IV                       | 12(46.2)                        | 14(53.8)   |            |
| <b>ER status</b>             |                                 |            |            |
| Negative                     | 17(53.1)                        | 15(48.4)   | 0.666      |
| Positive                     | 32(48.5)                        | 34(51.4)   |            |
| <b>PR status</b>             |                                 |            |            |
| Negative                     | 18(47.4)                        | 20(52.6)   | 0.6784     |
| Positive                     | 31(51.7)                        | 29(48.3)   |            |
| <b>HER2 status</b>           |                                 |            |            |
| Negative                     | 19(51.6)                        | 15(48.4)   | 0.6674     |
| Positive                     | 30(49.2)                        | 34(50.8)   |            |

\**P* values determined by Chi-square test using SPSS 25.0. All statistical tests were two-sided. ER= Estrogen receptor; PR=Progesterone receptor.

| <b>Table S3. The correlation between clinicopathological parameters and <i>DMT1</i> expression in Breast cancer. Related to Figure 6</b>                |                               |                   |                  |
|---------------------------------------------------------------------------------------------------------------------------------------------------------|-------------------------------|-------------------|------------------|
|                                                                                                                                                         | <b><i>DMT1</i> expression</b> |                   | <b><i>P</i>*</b> |
|                                                                                                                                                         | <b>Low, n(%)</b>              | <b>High, n(%)</b> |                  |
| <b>Age</b>                                                                                                                                              |                               |                   |                  |
| < 45                                                                                                                                                    | 10(47.6)                      | 11(52.4)          | 0.7994           |
| ≥45                                                                                                                                                     | 30(50.8)                      | 29(49.2)          |                  |
| <b>Invasive depth</b>                                                                                                                                   |                               |                   |                  |
| T1-T2                                                                                                                                                   | 36(55.4)                      | 29(44.6)          | 0.045            |
| T3-T4                                                                                                                                                   | 4(26.7)                       | 11(73.3)          |                  |
| <b>Lymph node metastasis</b>                                                                                                                            |                               |                   |                  |
| N=0                                                                                                                                                     | 15(48.4)                      | 10(51.6)          | 0.2278           |
| N=1,2,3                                                                                                                                                 | 25(51.0)                      | 30(49.0)          |                  |
| <b>TNM Stage</b>                                                                                                                                        |                               |                   |                  |
| I-II                                                                                                                                                    | 30(55.6)                      | 24(44.4)          | 0.1521           |
| III-IV                                                                                                                                                  | 10(37.5)                      | 16(62.5)          |                  |
| <b>ER status</b>                                                                                                                                        |                               |                   |                  |
| Negative                                                                                                                                                | 10(37.0)                      | 17(63.0)          | 0.098            |
| Positive                                                                                                                                                | 30(56.6)                      | 23(43.4)          |                  |
| <b>PR status</b>                                                                                                                                        |                               |                   |                  |
| Negative                                                                                                                                                | 11(39.3)                      | 17(60.7)          | 0.1596           |
| Positive                                                                                                                                                | 29(55.8)                      | 23(44.2)          |                  |
| <b>HER2 status</b>                                                                                                                                      |                               |                   |                  |
| Negative                                                                                                                                                | 14(43.8)                      | 18(56.2)          | 0.3613           |
| Positive                                                                                                                                                | 26(54.2)                      | 22(45.8)          |                  |
| * <i>P</i> values determined by Chi-square test using SPSS 25.0. All statistical tests were two-sided. ER= Estrogen receptor; PR=Progesterone receptor. |                               |                   |                  |

**Table S4. The correlation between clinicopathological parameters and *TFR1* expression in Breast cancer. Related to Figure 6**

|                              | <i>TFR1</i> expression |            | <i>P</i> * |
|------------------------------|------------------------|------------|------------|
|                              | Low, n(%)              | High, n(%) |            |
| <b>Age</b>                   |                        |            |            |
| < 45                         | 8(38.1)                | 13(61.9)   | 0.2039     |
| ≥45                          | 32(54.2)               | 27(45.8)   |            |
| <b>Invasive depth</b>        |                        |            |            |
| T1-T2                        | 33(50.8)               | 32(49.2)   | 0.7745     |
| T3-T4                        | 7(46.7)                | 8(53.3)    |            |
| <b>Lymph node metastasis</b> |                        |            |            |
| N=0                          | 11(44)                 | 14(66)     | 0.4693     |
| N=1,2,3                      | 29(52.7)               | 26(47.3)   |            |
| <b>TNM Stage</b>             |                        |            |            |
| I-II                         | 28(51.9)               | 26(48.1)   | 0.6331     |
| III-IV                       | 12(46.2)               | 14(53.8)   |            |
| <b>ER status</b>             |                        |            |            |
| Negative                     | 8(29.6)                | 19(70.4)   | 0.8195     |
| Positive                     | 32(60.4)               | 21(39.6)   |            |
| <b>PR status</b>             |                        |            |            |
| Negative                     | 11(39.3)               | 17(60.7)   | 0.1596     |
| Positive                     | 29(55.8)               | 23(44.2)   |            |
| <b>HER2 status</b>           |                        |            |            |
| Negative                     | 13(42.4)               | 19(57.6)   | 0.1709     |
| Positive                     | 27(55.3)               | 21(44.7)   |            |

\**P* values determined by Chi-square test using SPSS 25.0. All statistical tests were two-sided. ER= Estrogen receptor; PR=Progesterone receptor.

**Table S5. Sequences of Oligonucleotides for qPCR and RNA Interference.**

| Oligonucleotides Resource | Sequence                | Application    |
|---------------------------|-------------------------|----------------|
| <i>Loc729013</i> qF       | CTCAAACCTTCACTAGCCCCGT  | RT-qPCR primer |
| <i>Loc729013</i> qR       | GAATGGGATGGGAGGACACA    | RT-qPCR primer |
| GAPDH qF                  | CAGGGCTGCTTTTAACTCTGGTA | RT-qPCR primer |
| GAPDH qR                  | CATGGGTGGAATCATATTGGAAC | RT-qPCR primer |
| XIST qF                   | GACACAAGGCCAACGACCTA    | RT-qPCR primer |
| XIST qR                   | TCGCTTGGGTCTCTATCCA     | RT-qPCR primer |
| <i>SNHG6</i> qF           | GCGTCAGCAAATCATGGACA    | RT-qPCR primer |
| <i>SNHG6</i> qR           | TGTGCCACTTTTCTTGGTGG    | RT-qPCR primer |
| <i>ARRDC3-AS1</i> qF      | CCAACCCTTCCCATCCAAC     | RT-qPCR primer |
| <i>ARRDC3-AS1</i> qR      | ATCATGTTCTGTCCGCCCTC    | RT-qPCR primer |
| <i>LOC7299506</i> qF      | CCTTGCTTTGCTGGGATGTG    | RT-qPCR primer |
| <i>LOC7299506</i> qR      | AACTCAGTGCTGCCGATTGT    | RT-qPCR primer |
| <i>LOC84856</i> qF        | AACTGCCCATACGGACCTAC    | RT-qPCR primer |
| <i>LOC84856</i> qR        | GGTGAAGAGGCAGATCCCAAG   | RT-qPCR primer |
| <i>LEF1-AS1</i> qF        | GGAATTCGCGAAAAGGAGA     | RT-qPCR primer |
| <i>LEF1-AS</i> qR         | TTTTACGCTCCACGAGTT      | RT-qPCR primer |
| <i>C1orf213</i> qF        | ATCCCAGAACCTTGGCTAC     | RT-qPCR primer |
| <i>C1orf213</i> qR        | CACTGGGAACAGGACTCA      | RT-qPCR primer |
| <i>Clorf126</i> qF        | CTGATTACCTCCACGTGCC     | RT-qPCR primer |
| <i>Clorf126</i> qR        | GGCAAATTGCTTGTGTCT      | RT-qPCR primer |
| <i>LOC728175</i> qF       | GGGAAAAGGCCTCATCGACA    | RT-qPCR primer |
| <i>LOC728175</i> qR       | GAATAGAGAGCCCGGAAGGC    | RT-qPCR primer |
| <i>PCOLCE-AS1</i> qF      | TCACCTACCCAAGAAGGGGT    | RT-qPCR primer |
| <i>PCOLCE-AS1</i> qR      | TGTGCCCAGCTAGAGTCAGA    | RT-qPCR primer |
| <i>PSMG3-AS1</i> qF       | ACCTGGAAATTCAGCCGAGG    | RT-qPCR primer |
| <i>PSMG3-AS1</i> qR       | TTGTGTGGTGGTGAGATCCG    | RT-qPCR primer |
| <i>TAPTF-AS1</i> qF       | TTACAGGTCCACGAACCTCGC   | RT-qPCR primer |
| <i>TAPTF-AS1</i> qR       | GGCTGCCCTAACTTGGCATA    | RT-qPCR primer |
| <i>LOC439990</i> qF       | ACCTGGAAATTCAGCCGAGG    | RT-qPCR primer |
| <i>LOC439990</i> qR       | TTGTGTGGTGGTGAGATCCG    | RT-qPCR primer |
| <i>FLJ14107</i> qF        | AAGTAGAAAACCGCTCCCA     | RT-qPCR primer |
| <i>FLJ14107</i> qR        | GACAACACCTGGTCTCCCTG    | RT-qPCR primer |
| <i>CLLU1</i> qF           | TGCAGATACGTATGGCACCC    | RT-qPCR primer |
| <i>CLLU1</i> qR           | ACACACATAAAGGGCAGCGA    | RT-qPCR primer |
| <i>RNASEH2B-AS1</i> qF    | CGCTTTGAACTACCCTTGGC    | RT-qPCR primer |
| <i>RNASEH2B-AS1</i> qR    | CTACTGGGTTGGAACCAGGG    | RT-qPCR primer |
| <i>CXORF28</i> qF         | AGAGCCACACAGCAATGGAT    | RT-qPCR primer |
| <i>CXORF28</i> qR         | TTGGTGGTGACGTTGGTTCA    | RT-qPCR primer |
| <i>DPYD-AS1</i> qF        | GGCATATGCTCTTGCGATGC    | RT-qPCR primer |
| <i>DPYD-AS1</i> qR        | GACACCCTTGGCTGTGATGA    | RT-qPCR primer |
| <i>SNHG1</i> qF           | GCACGTTGGAACCGAAGAGA    | RT-qPCR primer |
| <i>SNHG1</i> qR           | GCAGCTGAATTTCCCAGGATA   | RT-qPCR primer |
| <i>LOC728040</i> qF       | ACAACTGCTAAGCTCTTTGGGA  | RT-qPCR primer |
| <i>LOC728040</i> qR       | GCCAGGCTTAATTCGGCAAA    | RT-qPCR primer |
| <i>PAR-SN</i> qF          | AATCCAGTCAGTGTGCCTCA    | RT-qPCR primer |
| <i>PAR-SN</i> qR          | AGTGCAATACTACACCTGCCA   | RT-qPCR primer |
| <i>LOC643441</i> qF       | CTGGGATCGAACAGTGGCTT    | RT-qPCR primer |
| <i>LOC643441</i> qR       | GACAGGAAAGACTGGGTGGG    | RT-qPCR primer |
| <i>LOC728012</i> qF       | AACCAGCGGGTTACCTTTG     | RT-qPCR primer |
| <i>LOC728012</i> qR       | TGCCCCGGTCTGATGTTTTTC   | RT-qPCR primer |
| <i>ASAP1-1T1</i> qF       | GACCCCTGCTTACCAATCCC    | RT-qPCR primer |
| <i>ASAP1-1T1</i> qR       | GTCACCTCAGCTCCACGAAA    | RT-qPCR primer |
| <i>CFLAR-AS1</i> qF       | AGAGACCTTATTTCCGGCTGGC  | RT-qPCR primer |
| <i>CFLAR-AS1</i> qR       | TAGTGCAGCACCTTCATCTC    | RT-qPCR primer |
| <i>DNATB8-AS1</i> qF      | ACACCAATGTGCGAATGCAG    | RT-qPCR primer |
| <i>DNATB8-AS1</i> qR      | CTTCATGTGTGTGAGGCCGA    | RT-qPCR primer |
| <i>ZRANB2-AS1</i> qF      | GTAAGTGAAGCCCATGAAGT    | RT-qPCR primer |
| <i>ZRANB2-AS1</i> qR      | AACAAGATCACGGTCACCCG    | RT-qPCR primer |
| <i>LOC653160</i> qF       | CCCGAATGTTCCCTGGATGT    | RT-qPCR primer |

|                        |                         |                  |
|------------------------|-------------------------|------------------|
| <i>LOC653160</i> qF    | TTTTCCCGGGCCTAAGAAGG    | RT-qPCR primer   |
| <i>Loc100128682</i> qF | GCCGTGACCTCTTCAACTT     | RT-qPCR primer   |
| <i>Loc100128682</i> qR | GAGCACTGAACAACACTGCG    | RT-qPCR primer   |
| <i>Loc728724</i> qF    | AGCCAAGAGGCTGGAGTTTC    | RT-qPCR primer   |
| <i>Loc728724</i> qR    | TGGTGGTGGTTGTATCAGGC    | RT-qPCR primer   |
| <i>Clorf126</i> qF     | ATCCCCAGAACCTTGGCTAC    | RT-qPCR primer   |
| <i>Clorf126</i> qR     | CACTGGGAACAGGACTCA      | RT-qPCR primer   |
| <i>Loc729013</i> qF    | CTCAAACCTTACTAGCCCCGT   | RT-qPCR primer   |
| <i>Loc729013</i> qR    | GAATGGGATGGGAGGACACA    | RT-qPCR primer   |
| <i>Loc645249</i> qF    | AGGCCCCGCATTTTCAGATT    | RT-qPCR primer   |
| <i>Loc645249</i> qR    | GCTCTCAGCCTCGCCATAAA    | RT-qPCR primer   |
| <i>LINC00467</i> qF    | GCGTAGGCCGGACATTTCTA    | RT-qPCR primer   |
| <i>LINC00467</i> qR    | CCTGCCATGTTGGAAACTGC    | RT-qPCR primer   |
| <i>PACRG-AS1</i> qF    | CCTTTTGAGGCCACTTGCAC    | RT-qPCR primer   |
| <i>PACRG-AS1</i> qR    | TCCGTCTCCTCCGATTCT      | RT-qPCR primer   |
| <i>TFR1</i> qF         | GGACGCGCTAGTGTCTTCT     | RT-qPCR primer   |
| <i>TFR1</i> qR         | CATCTACTTGCCGAGCCAGG    | RT-qPCR primer   |
| <i>DMT1</i> qF         | GCTCTCATACCCATCCTCACATT | RT-qPCR primer   |
| <i>DMT1</i> qR         | TCCATTGGCAAAGTCACTCATT  | RT-qPCR primer   |
| <i>TF</i> qF           | CTGGGAGCTTCTCAACCAGG    | RT-qPCR primer   |
| <i>TF</i> qR           | TTGGCATTTCATCCTTGGGGG   | RT-qPCR primer   |
| <i>FTH1</i> qF         | GGCAAAGTTCTTCAAAGCCA    | RT-qPCR primer   |
| <i>FTH1</i> qR         | CATCAACCGCCAGATCAAC     | RT-qPCR primer   |
| <i>FTL</i> qF          | AACCATGAGCTCCCAGATTC    | RT-qPCR primer   |
| <i>FTL</i> qR          | CGGTCGAAATAGAAGCCCAG    | RT-qPCR primer   |
| <i>IRP1</i> qF         | CCTGGAGTGTGGTAGGAACAC   | RT-qPCR primer   |
| <i>IRP1</i> qR         | GATCGAAAATGGTAAGCGCCC   | RT-qPCR primer   |
| <i>IRP2</i> qF         | AGCCTAAGAAGCTTCCCTGC    | RT-qPCR primer   |
| <i>IRP2</i> qR         | AGCCTAAGAAGCTTCCCTGC    | RT-qPCR primer   |
| <i>FPN</i> qF          | TGGAAGAAGGAAAAGAAAATCCC | RT-qPCR primer   |
| <i>FPN</i> qR          | GGTGCTTGTTAACAGGAGTGC   | RT-qPCR primer   |
| <i>HEPH</i> qF         | CCAGACCTCTCTGGGATGTT    | RT-qPCR primer   |
| <i>HEPH</i> qR         | TCTGTGCATGCTCATGGAGT    | RT-qPCR primer   |
| <i>Hepcidin</i> qF     | TGACCAGTGGCTGTCTTTTCC   | RT-qPCR primer   |
| <i>Hepcidin</i> qR     | GCAGCAGAAAATGCAGATGGG   | RT-qPCR primer   |
| <i>CTGF</i> qF         | CCAATGACAACGCCTCCTG     | RT-qPCR primer   |
| <i>CTGF</i> qR         | GAGCTTTCTGGCTGCACCA     | RT-qPCR primer   |
| <i>CYR61</i> qF        | AGCCTCGCATCCTATAACAACC  | RT-qPCR primer   |
| <i>CYR61</i> qR        | GAGTGCCGCTTGTGAAAGAA    | RT-qPCR primer   |
| <i>AMOTL2</i> qF       | AGCTTCAATGAGGGTCTGCT    | RT-qPCR primer   |
| <i>AMOTL2</i> qR       | TGAAGGACCTTGATCACTGC    | RT-qPCR primer   |
| <i>DMT1-promoter-F</i> | TTTGGGACCCACAGGTCATC    | RT-qPCR primer   |
| <i>DMT1-promoter-R</i> | GGGTTGGCTGCTCTCATTAT    | RT-qPCR primer   |
| <i>ChIP-DMT1-F</i>     | TGATCAGTTTTCCGTGCTGC    | RT-qPCR primer   |
| <i>ChIP-DMT1-R</i>     | TGGGAAGAAAATACATTGGCGG  | RT-qPCR primer   |
| <i>ChIP-LncRIM-F</i>   | TTCGAAGGTGTTTCCCCGAA    | RT-qPCR primer   |
| <i>ChIP-LncRIM-R</i>   | AAGGAGCATCTGTTCCCACC    | RT-qPCR primer   |
| <i>DMT1-IRE-F</i>      | GAGCCAGTGTGTTTCTATGG    | RT-qPCR primer   |
| <i>DMT1-IRE-R</i>      | CCTAAGCCTGATAGAGCTAG    | RT-qPCR primer   |
| <i>non-IRE-F</i>       | GGGAAGGGTGTTCAAAAGT     | RT-qPCR primer   |
| <i>non-IRE-R</i>       | CAATGCAGCACGGAAAAGT     | RT-qPCR primer   |
| <i>1A-F</i>            | GGAGCTGGCATTGGGAAAGTC   | RT-qPCR primer   |
| <i>1A-R</i>            | GGAGATCTTCTCATTAAAGTAAG | RT-qPCR primer   |
| <i>1B-F</i>            | GTTGCGGAGCTGGTAAGAATC   | RT-qPCR primer   |
| <i>1B-R</i>            | GGAGATCTTCTCATTAAAGTAAG | RT-qPCR primer   |
| <i>siScramble</i>      | UUCUCCGAACGUGUCACGUTT   | RNA interference |
| <i>siLoc729013#1</i>   | GCCUCUUAUUGCCUGUAUA     | RNA interference |
| <i>siLoc729013#2</i>   | GAGACGAGCAUCUCACUAU     | RNA interference |
| <i>siLoc653160#1</i>   | GGACCUCUUUGUGGUCAAA     | RNA interference |
| <i>siLoc653160#2</i>   | GAGGCAAGAAAGGAACAGU     | RNA interference |
| <i>siLoc645249#1</i>   | CAGGGAAGAACACAAUA       | RNA interference |
| <i>siLoc645249#2</i>   | GAGGGTTACACTGACAGAT     | RNA interference |

|                 |                        |                  |
|-----------------|------------------------|------------------|
| siDNAJB8-AS1 #1 | GACCUUGAGAAGAUUUUAAA   | RNA interference |
| siDNAJB8-AS1 #2 | GCACAAACCAGTCATTGAA    | RNA interference |
| siPACRG-AS1 #1  | GGCUCAGGGAGAAUUUAAU    | RNA interference |
| siPACRG-AS1 #2  | GCUCGAGCUUUCUGAUGAU    | RNA interference |
| siLINC00467 #1  | GCUCUGUAAACCACAUAAU    | RNA interference |
| siLINC00467 #2  | GCCAGACAGAUUCAAGUAU    | RNA interference |
| shScramble      | UUCUCCGAACGUGUCACGU    | RNA interference |
| shLoc729013 #1  | CTGCTTTCTGAAGTTATTATT  | RNA interference |
| shLoc729013 #2  | GGAAGCAATTGTTCTCAAAC   | RNA interference |
| shNF2#1         | GCAGGTGATTTGTCTTAATCA  | RNA interference |
| shNF2#2         | GGAGATCACACAACATTTATT  | RNA interference |
| shYAP#1         | GGTCAGAGATACTTCTTAAAT  | RNA interference |
| shYAP#2         | GA CTCAGGATGGAGAAATTTA | RNA interference |
| shIRP2#1        | GAGGATGAGAAGAAATTATTT  | RNA interference |
| shIRP2#2        | GGACCTAAATCAGAATCATAG  | RNA interference |
| shIRP2#3        | CCACCGCAAGAACATTTACC   | RNA interference |
